# Supplementary material for: Triplet exciplexes as energy transfer photosensitisers
Source: Royal Society of Chemistry journal article supplement (doi:10.1039/b515831a), 2006-01-01
Supplement: b515831a.pdf [file b515831a.pdf]

## Electronic Supplementary Information

### Triplet exciplexes as energy transfer photosensitisers

Julia Pérez-Prieto,<sup>\*a</sup> Raquel E. Galian,<sup>a</sup> María C. Morant-Miñana,<sup>a</sup>  
Miguel A. Miranda<sup>b</sup>

<sup>a</sup> *Departamento de Química Orgánica/ICMOL, Universidad de Valencia, Av. Vicent Andrés Estellés s/n, 46100 Burjassot, Valencia.*

<sup>b</sup> *Departamento de Química/Instituto de Tecnología Química UPV-CSIC; Universidad Politécnica de Valencia, Camino de Vera s/n, 46071 Valencia.*

**ESI 2:** Transient kinetic traces observed at 430 nm after laser flash photolysis (355 nm) of a deaerated solution of (**S,S**)-**1** containing (**S**)-**5** and (**R**)-**5** in acetonitrile. Plot of  $\Delta A^{-1}$  vs.  $[\text{NP}]^{-1}$  for deaerated acetonitrile solutions of (**S,S**)-**1** (0.7 mM) containing increasing amounts of (**S**)-**5** (A) and (**R**)-**5** (B).

**ESI 3:** Transient kinetic traces observed at 430 nm after laser flash photolysis (355 nm) of a deaerated solution of (**S,S**)-**1** containing (**S**)-**6** and (**R**)-**6** in acetonitrile. Plot of  $\Delta A^{-1}$  vs.  $[\text{NP}]^{-1}$  for deaerated acetonitrile solutions of (**S,S**)-**1** (0.7 mM) containing increasing amounts of (**S**)-**6** (A) and (**R**)-**6** (B).

**ESI 4:** Plot of  $\Delta A^{-1}$  vs.  $[\text{NP}]^{-1}$  for deaerated acetonitrile solutions of (**R,S**)-**2** (0.7 mM) containing increasing amounts of (**S**)-**5** (A) and (**R**)-**5** (B).

**ESI 5:** Transient kinetic traces observed at 430 nm after laser flash photolysis (355 nm) of a deaerated solution of (**R,S**)-**2** containing (**S**)-**6** and (**R**)-**6** in acetonitrile. Plot of  $\Delta A^{-1}$  vs.  $[\text{NP}]^{-1}$  for deaerated acetonitrile solutions of (**R,S**)-**2** (0.7 mM) containing increasing amounts of (**S**)-**6** (A) and (**R**)-**6** (B).

**ESI 6:** Transient kinetic traces observed at 430 nm after laser flash photolysis (355 nm) of a deaerated solution of (**S**)-**3** containing (**S**)-**5** and (**R**)-**5** in acetonitrile. Plot of  $\Delta A^{-1}$  vs.  $[\text{NP}]^{-1}$  for deaerated acetonitrile solutions of (**S**)-**3** (1.1 mM) containing increasing amounts of (**S**)-**5** (A) and (**R**)-**5** (B).

**ESI 7:** Transient kinetic traces observed at 430 nm after laser flash photolysis (355 nm) of a deaerated solution of (**S**)-**3** containing (**S**)-**6** and (**R**)-**6** in acetonitrile. Plot of  $\Delta A^{-1}$  vs.  $[\text{NP}]^{-1}$  for deaerated acetonitrile solutions of (**S**)-**3** (1.1 mM) containing increasing amounts of (**S**)-**6** (A) and (**R**)-**6** (B).

**ESI 8:** Transient kinetic traces observed at 430 nm after laser flash photolysis (355 nm) of a deaerated solution of (**S**)-**4** containing (**S**)-**5** and (**R**)-**5** in acetonitrile. Plot of  $\Delta A^{-1}$  vs.  $[\text{NP}]^{-1}$  for deaerated acetonitrile solutions of (**S**)-**4** (1.1 mM) containing increasing amounts of (**S**)-**5** (A) and (**R**)-**5** (B).

**ESI 9:** Transient kinetic traces observed at 430 nm after laser flash photolysis (355 nm) of a deaerated solution of (**S**)-**4** containing (**S**)-**6** and (**R**)-**6** in acetonitrile. Plot of  $\Delta A^{-1}$  vs.  $[\text{NP}]^{-1}$  for deaerated acetonitrile solutions of (**S**)-**4** (1.1 mM) containing increasing amounts of (**S**)-**6** (A) and (**R**)-**6** (B).

**ESI 10:** (U)B3LYP/6-31G\*-optimised geometry of an intramolecular <sup>3</sup>(BT-InH)\* exciplex

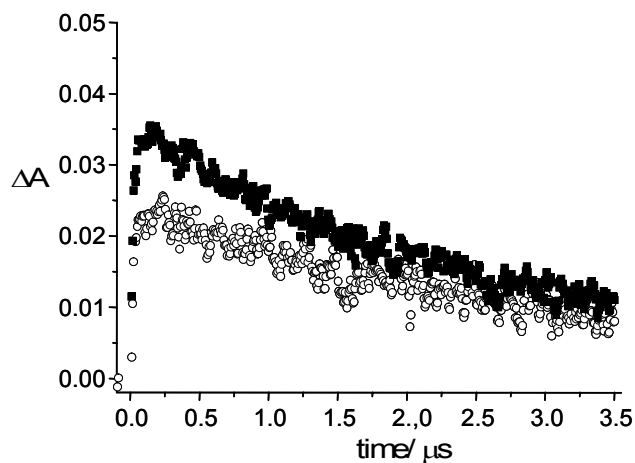

**Fig. 4** Transient kinetic traces observed at 430 nm after the laser Flash photolysis (355 nm) of a deaerated solution of (*S,S*)-**1** (0.7 mM) containing 9.9 mM of (*R*)-**5** (■) and (*S*)-**5** (○) in acetonitrile.

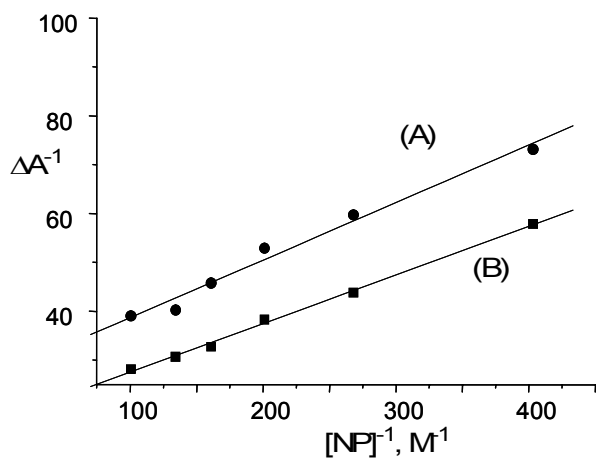

**Fig. 5** Plot of  $\Delta A^{-1}$  vs.  $[NP]^{-1}$  for deaerated acetonitrile solutions of (*S,S*)-**1** (0.7 mM) containing increasing amounts of (*S*)-**5** (A) and (*R*)-**5** (B).

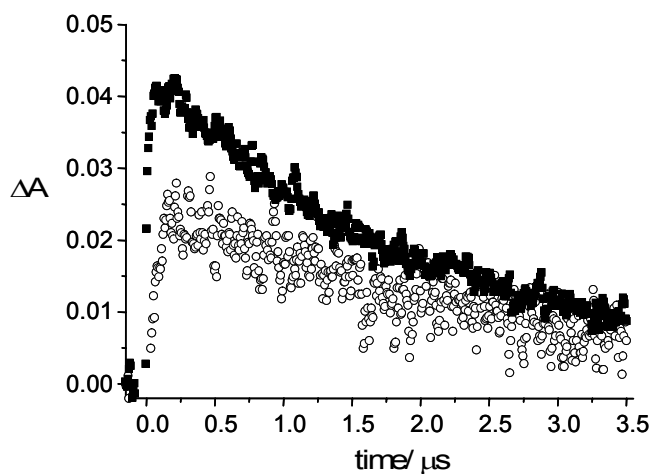

**Fig. 6** Transient kinetic traces observed at 430 nm after the laser Flash photolysis (355 nm) of a deaerated solution of (*S,S*)-**1** (0.7 mM) containing 9.9 mM of (*R*)-**6** (■) and (*S*)-**6** (○) in acetonitrile.

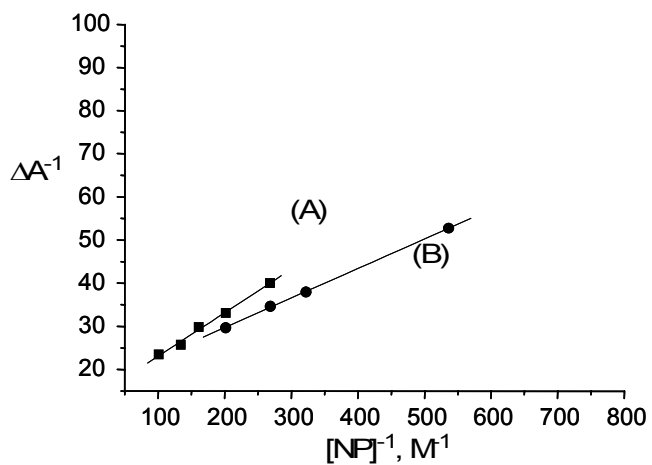

**Fig. 7** Plot of  $\Delta A^{-1}$  vs.  $[NP]^{-1}$  for deaerated acetonitrile solutions of (*S,S*)-**1** (0.7 mM) containing increasing amounts of (*S*)-**6** (A) and (*R*)-**6** (B).

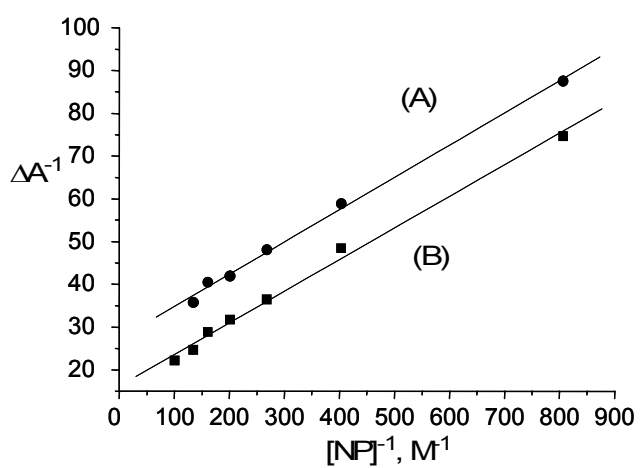

**Fig. 8** Plot of  $\Delta A^{-1}$  vs.  $[NP]^{-1}$  for deaerated acetonitrile solutions of (*R,S*)-**2** (0.7 mM) containing increasing amounts of (*S*)-**5** (A) and (*R*)-**5** (B).

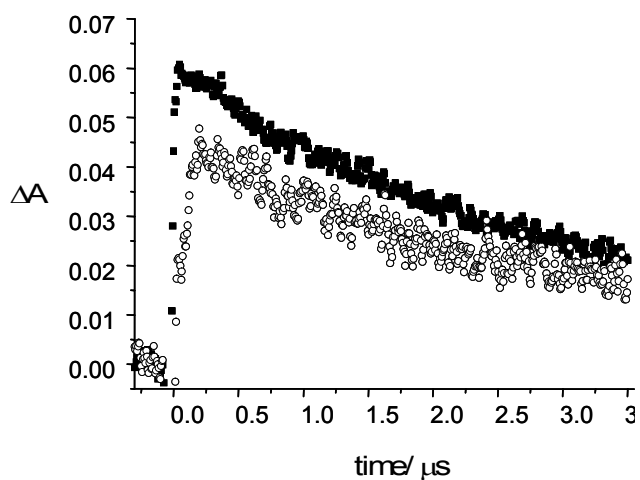

**Fig. 9** Transient kinetic traces observed at 430 nm after the laser flash photolysis (355 nm) of a deaerated solution of *(R,S)*-2 (0.7 mM) containing 9.9 mM of *(R)*-6 (■) and *(S)*-6 (○) in acetonitrile.

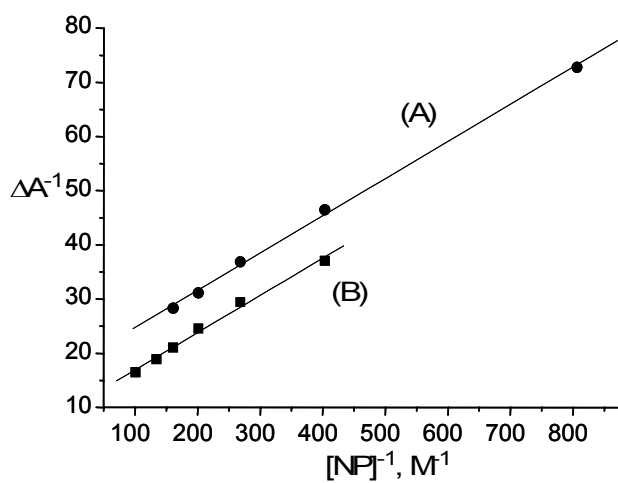

**Fig. 10** Plot of  $\Delta A^{-1}$  vs.  $[NP]^{-1}$  for deaerated acetonitrile solutions of *(R,S)*-2 (0.7 mM) containing increasing amounts of *(S)*-6 (A) and *(R)*-6 (B).

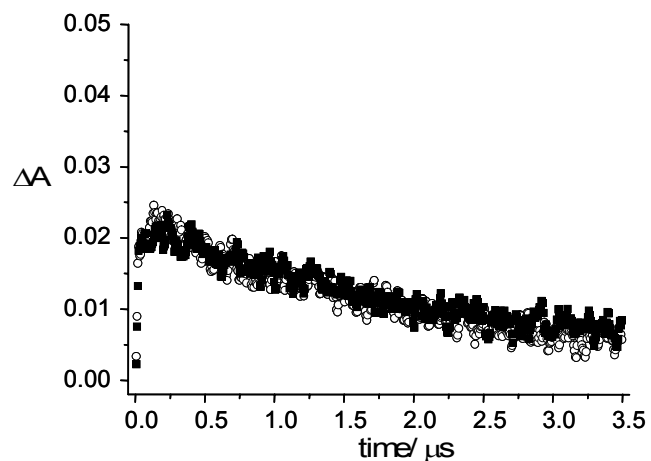

**Fig. 11** Transient kinetic traces observed at 430 nm after the laser Flash photolysis (355 nm) of a deaerated solution of (*S*)-**3** (1.1 mM) containing 9.9 mM of (*R*)-**5** (■) and (*S*)-**5** (○) in acetonitrile.

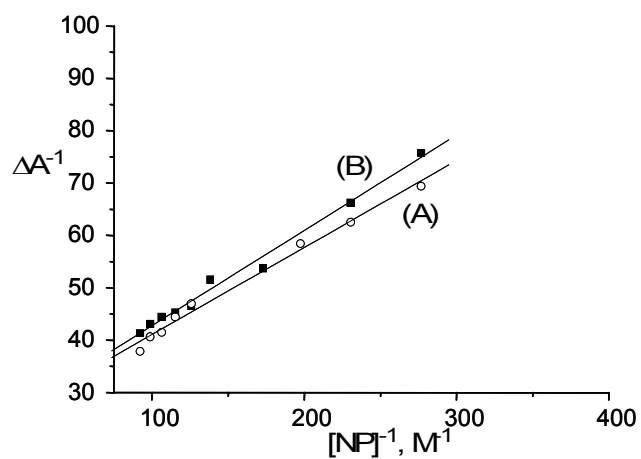

**Fig. 12** Plot of  $\Delta A^{-1}$  vs.  $[NP]^{-1}$  for deaerated acetonitrile solutions of (*S*)-**3** (1.1 mM) containing increasing amounts of (*S*)-**5** (A) and (*R*)-**5** (B).

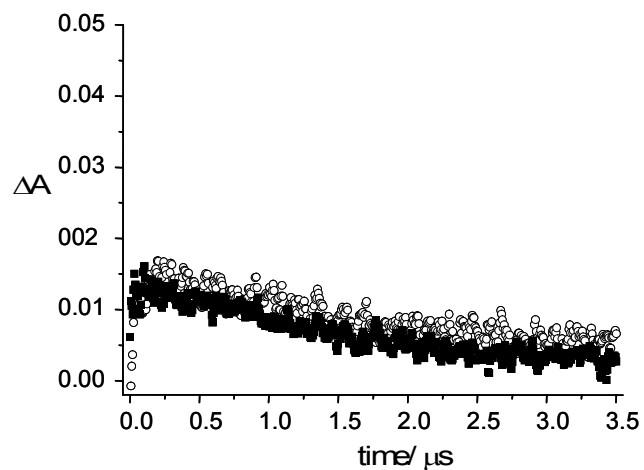

**Fig. 13** Transient kinetic traces observed at 430 nm after the laser flash photolysis (355 nm) of a deaerated solution of (*S*)-**3** (1.1 mM) containing 9.9 mM of (*R*)-**6** (■) and (*S*)-**6** (○) in acetonitrile.

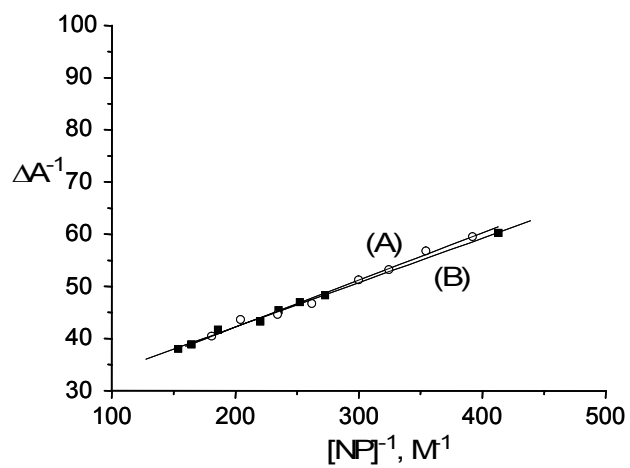

**Fig. 14** Plot of  $\Delta A^{-1}$  vs.  $[NP]^{-1}$  for deaerated acetonitrile solutions of (*S*)-**3** (1.1 mM) containing increasing amounts of (*S*)-**6** (A) and (*R*)-**6** (B).

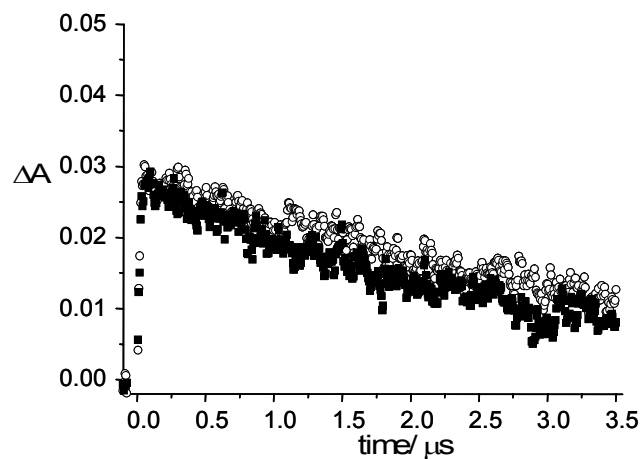

**Fig. 15** Transient kinetic traces observed at 430 nm after the laser flash photolysis (355 nm) of a deaerated solution of (*S*)-4 (1.1 mM) containing 9.9 mM of (*R*)-5 (■) and (*S*)-5 (○) in acetonitrile.

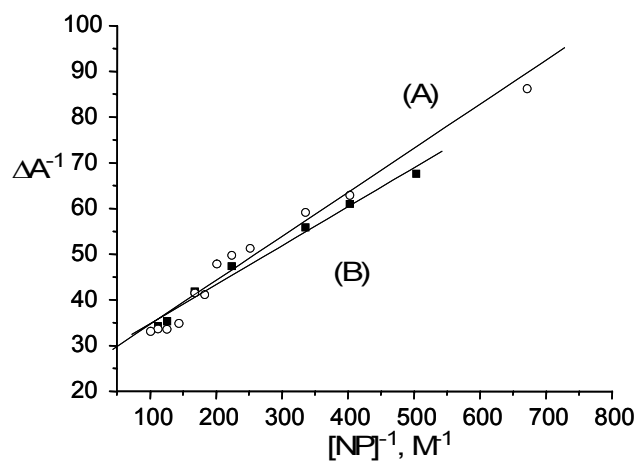

**Fig. 16** Plot of  $\Delta A^{-1}$  vs.  $[NP]^{-1}$  for deaerated acetonitrile solutions of (*S*)-4 (1.1 mM) containing increasing amounts of (*S*)-5 (A) and (*R*)-5 (B).



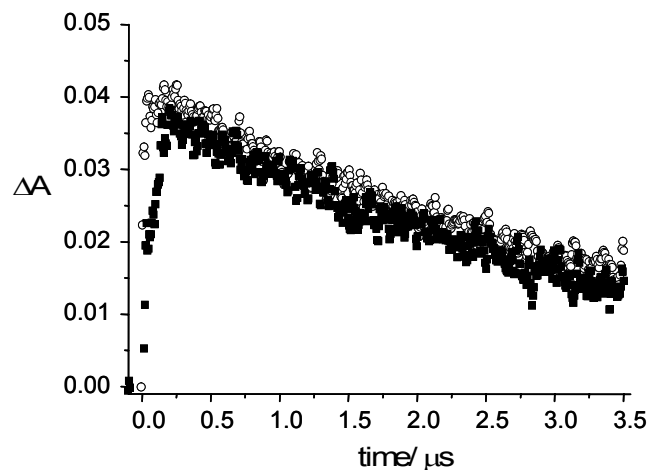

**Fig. 17** Transient kinetic traces observed at 430 nm after the laser flash photolysis (355 nm) of a deaerated solution of (*S*)-4 (1.1 mM) containing 9.9 mM of (*R*)-6 (■) and (*S*)-6 (○) in acetonitrile.

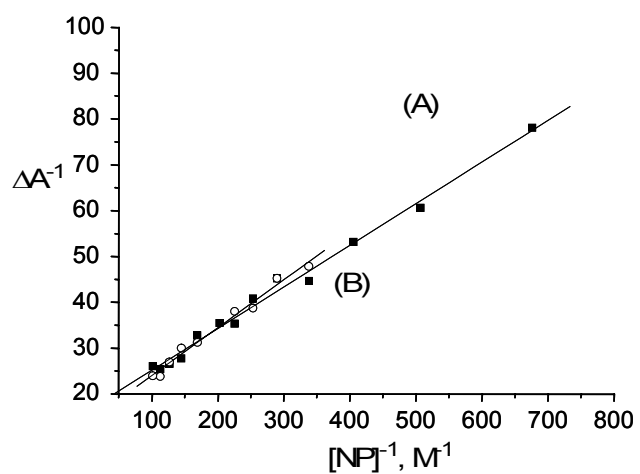

**Fig. 18** Plot of  $\Delta A^{-1}$  vs.  $[NP]^{-1}$  for deaerated acetonitrile solutions of (*S*)-4 (1.1 mM) containing increasing amounts of (*S*)-6 (A) and (*R*)-6 (B).

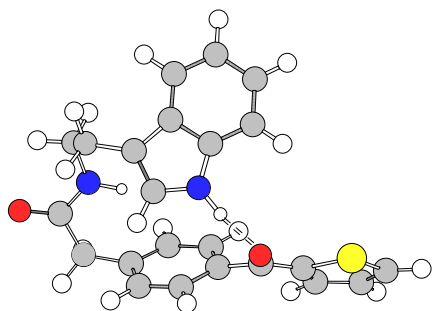

**Fig. 19** (U)B3LYP/6-31G\*-optimised geometry of an intramolecular  $^3(\text{BT-InH})^*$  exciplex.
